# Supplementary material for: Constraining the response of phytoplankton to zooplankton grazingand photo-acclimation in a temperate shelf sea with a 1-D model -towards S2P3 v8.0
Source: Copernicus journal article supplement (doi:10.5194/gmd-2019-345), 2020-01-30
Supplement: Supplementary file [file gmd-2019-345-AC1-supplement.pdf]

## **Referee 1**

### ***General comments***

**Referee comment:** The manuscript describes improvements made to a 1D nutrients-phytoplankton model in order to better describe the dynamics of the pelagic ecosystem in terms of phytoplankton growth and zooplankton biomass. Model simulations that included flexible stoichiometry and photo acclimation mechanisms for phytoplankton and variable grazing by zooplankton were compared with an ample set of observations collected in a temperate shelf sea. The integration of modelled and observed estimates of phytoplankton biomass and physiology, and zooplankton biomass, constitutes the main strength of the work.

However, from my perspective, it is not clear under the current state of the manuscript what are the main findings of the work and why are they relevant. Model improvements are not innovative per se, and it is not clear how these improvements have contributed to provide insight into the dynamics of the ecosystem in such shelf sea.

Also, the model description is not very detailed and this makes difficult to understand which are exactly the model improvements that the authors are testing in this work. The description of sampling procedures is not complete, since relevant information about samples' collection and analysis techniques is missing.

**Response:** Thank you for your overall comment in this work, which provides a general overview of what was done and comments on the novelty of this paper. GMD is a scientific journal dedicated to the public discussion of the description, development, and evaluation of numerical models as described in the website. This paper was uploaded as a "Development and technical paper", for which the aim is to describe technical developments and model improvements. We think that this paper meets the requirements to be published under the standards of GMD and the manuscript type selected as the aim is to show the improvement in a published model (S2P3 v7.0) based on comparison to observations, which are demonstrated to have a better agreement with the dataset used for the CCS location. We demonstrate an improvement in assessing the dynamics of the selected region, increasing confidence in the results with the model (S2P3 v8.0). Furthermore, this paper also highlights the relative importance of certain processes (e.g. zooplankton grazing and photo-acclimation), which under the general perspective of shelf sea modeling are processes that can be better understood with the sensitive analysis done in this work and which should be taken into account for accuracy in the representation of the shelf sea ecosystem.

However, we understand that the initial manuscript might have had some confusing sections based on the comments of this reviewer and we will revise the manuscript to allow clearer understanding of the model development and specific relevance to the biogeochemistry of shelf seas.

**Changes in manuscript:** Please see our responses to following specific comments and the associated changes.

### ***Specific comments***

#### *Introduction*

**Referee comment:** My main comment about the introduction is that is not clear from the text what is the point of the work, what does it add to the existing knowledge?

**Response:** The point of the work is substantial development of the biological component of the model, as previously reported in Marsh et al. (2015). This is already clearly articulated in the Introduction (see L 26-42).

**Changes in manuscript:** None needed.

**Referee comment:** L50-54 This paragraph is difficult to understand. The authors say that they implemented flexible stoichiometry in the model and photoacclimation in the chlorophyll description, but they cite Droop which suggest that they have also included some functional relationship between growth rate and internal nutrient status or quotas. I think the authors should clarify which are exactly the modifications done in the model, only flexible stoichiometry or a full Droop's model.

**Response:** As stated in the indicated section, we implemented the Geider et al. 1998 model, which does indeed link growth to internal cellular nutrient status. We have clarified this in the text

**Changes in manuscript:** Moreover, changes in nutrient availability can further alter cellular chlorophyll and nitrogen quotas (Droop, 1983; Geider et al., 1998). The combined representation of these two processes in the physiological model of Geider et al. (1998) has been widely implemented in biogeochemical models (Moore et al. 2002). We term this new version of S2P3 v7.0 as S2P3-Photoacclim, which relates phytoplankton growth rates to cell quota (Droop, 1983), through linking the light-, nutrient-, and temperature-dependencies of phytoplankton growth rate to varying ratios of N : C : Chl (Geider et al., 1998).

**Referee comment:** L65 The authors mention here several models, but it is easy to get lost at this point. Perhaps a list of the models compared would be useful.

**Response:** We agree that some context is helpful here.

**Changes in manuscript:** Each characteristic is now related to a model in this sentence to about confusion. Reference to Figure 1 also allows clarification.

**Referee comment:** L69 “the effects of photo-acclimation and flexible stoichiometry” on what?

**Response:** We refer to the effects of these processes in the CCS location and to the response of phytoplankton to changes in their environment.

**Changes in manuscript:** Further comments and details have been added (see L69-72).

## *Methods*

**Referee comment:** L107 Is that really internal nitrogen (m3 as phyto biovolume) or it is just phytoplankton nitrogen concentration in sea water? I believe is the latter, as in zooplankton (L108), so the sentence should state nitrogen and not internal nitrogen.

**Response:** Yes, it corresponds to phytoplankton nitrogen concentration.

**Changes in manuscript:** We have amended descriptions as ‘internal nitrogen’, rather than ‘nitrogen’.

**Referee comment:** L101-118 This model description is not very clear. Does S2P3-NPZ includes flexible stoichiometry? I guess it does since phytoplankton is described with Chl<sub>a</sub> and N. If the ratio is fixed there is no need to compute both. The authors mentioned in the introduction that the approach used was a Droop model, where the growth rate has to depend on the internal quotas of nutrients. The way the authors describe the model it seems that S2P3-Photoacclim allows flexible stoichiometry but it is not clear how growth depends on quotas. It is also the growth dependent on quotas in S2P3-NPZ? I would suggest the authors to include the equations of the phytoplankton growth model they are using, to ensure clarity and reproducibility.

**Response:** S2P3-NPZ includes a variable Chl:N as in S2P3 v7.0. For S2P3-Photoacclim the Chl:N:C varies, according to Geider et al. 1998 and in the source code of the model provided in Code and Data availability section. The choice of not including equations here and providing details of the equations with Figure 1

was decided based on the already published equations from different manuscripts (Geider et al., 1998, Sharples et al. 2006, Marsh et al., 2015). But we agree that further information about the S2P3 v8.0 should be provided with the equations.

**Changes in manuscript:** We will provide additional model details in Supplementary material (see Appendix A).

**Referee comment:** Figure 1. I imagine the idea of Figure 1 is to illustrate those equations without having to display them. Figure 1 is useful but not all symbols are explained. For instance,  $u$ ,  $Z$  (zooplankton?) and  $QP$  are not described. Also, uptake of  $N$  in a) is  $u \times \text{PhytoChla}$  but in b) to d) is  $u \times \text{PhytoC}$ , I would say that a  $Q$  is necessary somewhere to convert units. And also in Figure 1, it is not clear how growth or uptake depend on quotas, if they do. Since one of the main goals of the manuscript is to account for flexible stoichiometry and hence simulate elemental quotas, maybe for improving clarity the authors could give clear names or symbols to each quota and refer to them throughout the manuscript.

**Response:** It is difficult to describe all those variables and parameters with one figure.

**Changes in manuscript:** As noted above, we will provide additional model details in Supplementary Material.

**Referee comment:** L126. The description of the sampling performed during the SSB programme needs improvement: L129. Samples collected for what? Chlorophyll? L131. Please, indicate where this mooring is located. L132. I don't understand what info gives the term "stainless and titanium". L133. How these discrete samples were collected? with bottles? L134. The details about the CTD deployment in the other locations (not CCS) are missing.

**Response:** We agree that details of observations are appropriate.

**Changes in manuscript:** For this set of questions about section 4.1, more details are provided for the SSB programme in terms of surface chlorophyll, indicating where the mooring was located (lat, lon), how and where the discrete samples were collected (Niskin bottles), and further details of other CTD deployments in the Celtic Sea are provided in Table A1. The term of 'stainless and titanium' has been removed as an unnecessary detail.

**Referee comment:** L136. The description of the sampling of zooplankton biomass needs improvement: L138. How this zooplankton samples are collected? With nets? If so, please, specify the type of net and the type of trawl. L140. How

zooplankton biomass was measured?

**Response:** Again, we agree that further measurement details here are informative, although we note that a fuller description is provided in the published paper describing this data.

**Changes in manuscript:** A more detailed description of the zooplankton biomass sampling in section 4.2 has been added. This further detailed description includes information about how the zooplankton was collected (using nets of different sizes). Also, it is explained how zooplankton biomass was measured (using a FlowCam and ZooScan).

**Referee comment:** L146. The description of the sampling for phytoplankton is also very vague: L148. Phytoplankton samples were collected with bottles? At “a number of stations” seems very vague.

**Response:** Again, we agree that further measurement details here are informative.

**Changes in manuscript:** Further description of the physiological observations is detailed in section 4.3 now. Phytoplankton were collected at different stations in the Celtic Sea and at different depths using Niskin bottles. Please see these added details in first paragraph of section 4.3.

## *Results*

**Referee comment:** L177 The behaviour of S2P3-Photoacclim (blue line) seems very different to S2P3- NPZ, similar maybe in magnitude but not in timing.

**Response:** Given further consideration about the physiological observations used, it was decided that the stations CS2 and N1 should not be used for the validation of the S2P3-Photoacclim and S2P3 v8.0 models because one of the important assumptions of these models is that they do not consider advective fluxes and these stations are very close to the shelf edge where horizontal advection is relevant. This allowed better constraint of S2P3-Photoacclim and, therefore, it presents an improved representation of the ecosystem (timing and magnitude of the spring bloom are more similar to the buoy observations, Figures 3a, 4).

**Changes in manuscript:** For new values constrained in this model see Table 1. Table 3 values of S2P3-Photoacclim are also amended.

**Referee comment:** L185 Zooplankton biomass increased 1 month later than phytoplankton in 2014 but definitely not in 2015.

**Response:** We agree that this is worthy of note.

**Changes in manuscript:** Section 4.4, L207, sentence rephrased specifying that the 1 month difference occurs during 2014, while in 2015 there is not.

**Referee comment:** L190 The expression “have not reached the SPB” is ambiguous. Maybe they haven’t reached the peak of the bloom, but, at least for S2P3-NPZ, the accumulation of biomass has already started accordingly to Figure 3. It would be necessary to clarify to which event of the SPB the authors refer.

**Response:** The timing of the spring phytoplankton bloom corresponds to a specific threshold.

**Changes in manuscript:** We now clarify and detail further as the term ‘reaching the spring phytoplankton bloom’ according to different definitions in the literature. Based on this definition, dates for the spring phytoplankton bloom being reached by each model are now also specified. The corresponding sentence is rephrased (L215).

**Referee comment:** Figure 4. I miss the same figure for 2014, are CTD data not available for this year?

**Response:** CTD observations were available for the CCS location in 2014 only during November, otherwise the year 2014 would have been included to compare CTD casts during spring and summer as in the year 2015.

**Changes in manuscript:** None needed.

**Referee comment:** L203. The description of results regarding phytoplankton physiology seems a bit short and does not give much information about the agreement of the model and observations: L205 If it is a 1D model, are not the vertical gradients the only ones available? Figure 5. The vertical gradients are difficult to see for observations, especially for Pmax.

**Response:** We agree that further details should be provided in the description of the results that compare phytoplankton physiology between the model and observations.

**Changes in manuscript:** Further description of the extent to which the modelled values and vertical gradients in Figure 5 match the data will be added.

**Referee comment:** L218. To which location correspond Figures 6 and 7?

**Response:** All this paper is based at the CCS location, with all models calibrated

for that specific region.

**Changes in manuscript:** This is specified again in this sentence, which is also rephrased (L244).

**Referee comment:** L236. In Figure 7 I don't feel it is possible to see which event follows which. Maybe a mean seasonal cycle with some metric for interannual variability would be more easy to interpret.

**Response:** We agree to include details of the seasonal cycle and associated variability.

**Changes in manuscript:** Figure 7 has been modified to show the seasonal cycle of each variable in the S2P3 v8.0 model (black lines) and with the red lines representing the 95% quantiles (i.e. 95% of the data lie between these lines) of each variable over the 51 years of simulation to represent the inter-annual variability present in the dynamics of the ecosystem.

**Referee comment:** Figure 7 legend. Does this “forced with all meteorological components” refer to the whole model result? I imagine it does, but here it seems it refers to NPP only.

**Response:** We agree that clarification is helpful.

**Changes in manuscript:** Legend of Figure 7 rephrased and more details added to avoid this confusion.

**Referee comment:** L244. Parameters listed in Table 1. The reader does not know where these parameters fit into the model. They are not in Figure 1 and no equation that includes them is shown in the manuscript.

**Response:** See response to earlier comments.

**Changes in manuscript:** As noted above, we will provide additional model details in Supplementary Material (see Appendix A).

**Referee comment:** Not all A Figures are described, are all necessary?

**Response:** We agree that further details were needed in the description of those figures. They were all described but not explicitly referred to which figure it corresponded.

**Changes in manuscript:** Reference to each figure has been added and further details to show the relevance of including each of them in the Appendix (see

Section 5).

**Referee comment:** L276. The meaning of this sentence is not clear to me.

**Response:** Noted. This sentence has been re-written in a clearer way

**Changes in manuscript:** See L322 for changes in this sentence.

**Referee comment:** Table 2. It is not clear what this “timing of the SPB” means. Is it day of the onset, day of the peak? DW is dry-weight? If I am not wrong, it is not explained anywhere in the manuscript.

**Response:** Timing of the spring phytoplankton bloom is referred as the quantitative definition for the start of the spring phytoplankton bloom.

**Changes in manuscript:** This is now described in section 4.4, L217. In the description of Table 2, it has been specified that corresponds to such definition. For the DW units of zooplankton, they are now explained in section 4.2, for zooplankton biomass dataset, L165.

**Referee comment:** To which location/area correspond the metrics in Table 2 and Table 3?

**Response:** For the CCS location.

**Changes in manuscript:** Specified now in the legend of Tables 2, 3, and in the description of each table (L298, LL314).

### *Conclusions*

**Referee comment:** L300. I am afraid I wouldn't call this work innovative. NPZ models that include grazing are commonly used. Flexible stoichiometry I would say is almost the norm when describing phytoplankton pools. And the description of photoacclimation through the parameterization proposed by (Geider et al. 1998) is virtually standard in biogeochemical models. L305. This last sentence is difficult to understand. And also, I miss one sentence or paragraph that clearly states why this work is an advance in our knowledge.

**Response:** As we explained in response to general comments, the advance of this work is substantial development of a model originally described in GMD.

**Changes in manuscript:** None needed.

### *Technical corrections*



**Referee comment:** L18 SSB acronym not defined.

**Change to manuscript:** Amended. Defined now in L18.

**Referee comment:** I would say “data” is plural (datum is the singular) and has been used as singular in several places (L20, L75, L82).

**Change to manuscript:** Noted. Lines where ‘data’ is used, it is changed as plural in their description. These include L20, L75, L82.

**Referee comment:** Sections 2 and 3 use mainly present tense, but there are several pasts in between that maybe can be reviewed (L76, L82, L103).

**Change to manuscript:** Noted and amended in sections 2 and 3.

**Referee comment:** L203 “Moreover” and “also” in the same sentence sound redundant.

**Change to manuscript:** Sentence amended. Moreover only included (L234).

**Referee comment:** L250. I am not sure, but I feel it is more clear to refer to ingestion rate of zooplankton and not phytoplankton.

**Response:** We understand why it is confusing thanks to your comment. To avoid further confusion, we will refer to  $R_m$  as: zooplankton maximal grazing rate.

**Change to manuscript:** Amended in L250, L253, Table 1.
